# Supplementary material
Source: PubMed Central journal article supplement (PMC4825010)
Supplement: 10.1074_M115.710277_jbc.M115.710277-1.pdf [file 10.1074_M115.710277_jbc.M115.710277-1.pdf]

**TABLE 1: (RT)PCR primers**

| <b>Gene</b>     | <b>Forward Primer</b>    | <b>Reverse Primer</b>     |
|-----------------|--------------------------|---------------------------|
| <i>Mct1</i>     | GCTGCTTCTGTTGTTGCGAATGGA | AAAGGCAAATCCAAAGACTCCCGC  |
| <i>Lef1</i>     | TTCAGGCAAGCCTACCCATCTTCA | TTCTCTGTTTCGTGCTCAGGCTTCA |
| <i>CyclinD1</i> | TGCTGCAAATGGAAGTCTTCTGG  | AAGGTCTGTGCATGTTTGC GGATG |
| <i>Pgp</i>      | TCTCCTATGCTGCTTGTTCGGT   | TTCGCGTAGTCAGGAGCGAATGAA  |
| <i>Fzd1</i>     | AAGTGCAGCAAGCTTTGTGGGT   | ACACACTGCCGTGAATCCAGACAA  |
| <i>Fzd2</i>     | TGCTGTGCTGCGCTTCTACTTT   | TGTGCCGATGAACAGGTACACGAA  |
| <i>Fzd3</i>     | TTGCTGTTTCATGCCAGTGCCT   | AGCTGGCCATTCAAAGCATGT     |
| <i>Fzd4</i>     | TTGGAATGGCCAGCTCCATTTGGT | TTTCGTTGCCTTTCCCTGGCTT    |
| <i>Fzd5</i>     | ATTCTTGGTGCGCCTGGTTGTA   | TGCCAATGCGGATCATGAGCTT    |
| <i>Fzd6</i>     | ACATTAGCGGCGTTTGCTTCGT   | AGCCTGGTTTGCCATGCTTCTT    |
| <i>Fzd7</i>     | TCATGAAGCACGATGGCACCAA   | AGCCAGCCCATGTCTTTCACAGTT  |
| <i>Fzd8</i>     | TGGTTCCTGGCGGCTGGTATGAAA | TTGGCCTCCTTGTTGCTTGAT     |
| <i>Fzd9</i>     | TGTGGTCCGCGTTGTGTTTCTT   | TGGTGCCGCCCGTCTTCATAATTT  |
| <i>Fzd10</i>    | ATGTGGGCAGCATGGATGTCAA   | TGTTCTTGCAAGTCAGCAGCCTT   |
| <i>Notch1</i>   | CACCTGCACTGACTATCT       | TAGGCACTCGTTGATCTC        |
| <i>Notch2</i>   | CTTTGAATGCCAGAGGAATAG    | CGTTGTTGCATCCCTTATC       |
| <i>Notch3</i>   | CGGCTTGATTTCACATAC       | GAAGATGACCAGCAGAAAG       |
| <i>Notch4</i>   | GTGAACGCGACGTCATGAATGCT  | ATTGAGACAGGTTCCAGGAAGGCA  |
| <i>Jagged1</i>  | CAGAATGGCGCCCAATGCTACAAT | AGTGGTCTTTCAGGTGTGAGCAGT  |
| <i>Jagged2</i>  | ATCACCCAGAGAGGAAAC       | GGAAGAGCCACCCATAA         |
| <i>Dll1</i>     | CTCTGTAGGAGAAGAGAAGAG    | CTTGGTGTCTTTGAAGTAG       |
| <i>Dll3</i>     | GGGACTCTCGATCTATTTATGT   | TCATTCAGGCTCCATCTC        |
| <i>Dll4</i>     | GAACCACACACTGGACTA       | GGCACCTTCTCTCCTAAA        |
| <i>Dlk1</i>     | CCAGGCCCTTCTACATTA       | GTTCACTAGATTCCACACAAG     |
| <i>Dlk2</i>     | ATCAGGAGTGTGAGGTTAG      | AGGTGAAAGGAGGTAAGG        |
| <i>Hes1</i>     | CAACACGACACCGGACAAACAAA  | TGGAATGCCGGGAGCTATCTTCT   |
| <i>Hes5</i>     | CTACAGCGAGGGTACT         | CGCTGGAAGTGGTAAAG         |
| <i>Hes7</i>     | GCCTAGAAGAGCTGAGG        | GCGAACTCCAGTATCTCT        |
| <i>Hey1</i>     | CTGAAGTTGCCCGTTATC       | GGATGCGTAGTTGTTGAG        |
| <i>Hey2</i>     | CCATCCAGTAGTGCATTTATAC   | GTTTCAGGCACTTAGGAAAC      |
| <i>HeyL</i>     | GGTCACTCAGAGGACAATA      | TCCTACCTAGCCAGAAATAC      |
| <i>Gapdh</i>    | ACAAGATGGTGAAGGTCGGTGTGA | AGCTTCCCATCTCAGCCTTGACT   |
| <i>β-actin</i>  | TTGCTGACAGGATGCAGAAGGAGA | ACTCCTGCTTGCTGATCCACATCT  |
