# Supplementary material
Source: PubMed Central journal article supplement (PMC4825010)
Supplement: 10.1074_M115.710277_jbc.M115.710277-2.pdf [file 10.1074_M115.710277_jbc.M115.710277-2.pdf]

**TABLE 2: Expected sizes of PCR products and RE<sup>a</sup> digests for each *Fzd* receptor**

| <b>Receptor gene</b> | <b>Expected size of PCR product (bp)</b> | <b>RE for amplicon verification</b> | <b>Banding pattern after digestion (bp)</b> |
|----------------------|------------------------------------------|-------------------------------------|---------------------------------------------|
| <i>Fzd1</i>          | 547                                      | BstEII                              | 403, 144                                    |
| <i>Fzd2</i>          | 527                                      | MboI                                | 418, 109                                    |
| <i>Fzd3</i>          | 544                                      | HindIII                             | 344, 200                                    |
| <i>Fzd4</i>          | 669                                      | MboI                                | 373, 296                                    |
| <i>Fzd5</i>          | 503                                      | ApaI                                | 368, 135                                    |
| <i>Fzd6</i>          | 588                                      | BstEII                              | 316, 272                                    |
| <i>Fzd7</i>          | 647                                      | SmaI                                | 454, 193                                    |
| <i>Fzd8</i>          | 301                                      | HpaII                               | 165, 136                                    |
| <i>Fzd9</i>          | 600                                      | PstI                                | 317, 283                                    |
| <i>Fzd10</i>         | 614                                      | BstEII                              | 497, 117                                    |

<sup>a</sup> RE, restriction enzyme
